# Supplementary material for: An Artificial Neural Network Integrated Pipeline for Biomarker Discovery Using Alzheimer's Disease as a Case Study
Source: PubMed Central journal article supplement (PMC6026215; doi:10.1016/j.csbj.2018.02.001), 2018-02-21
Supplement: mmc3.pdf [file mmc3.pdf]

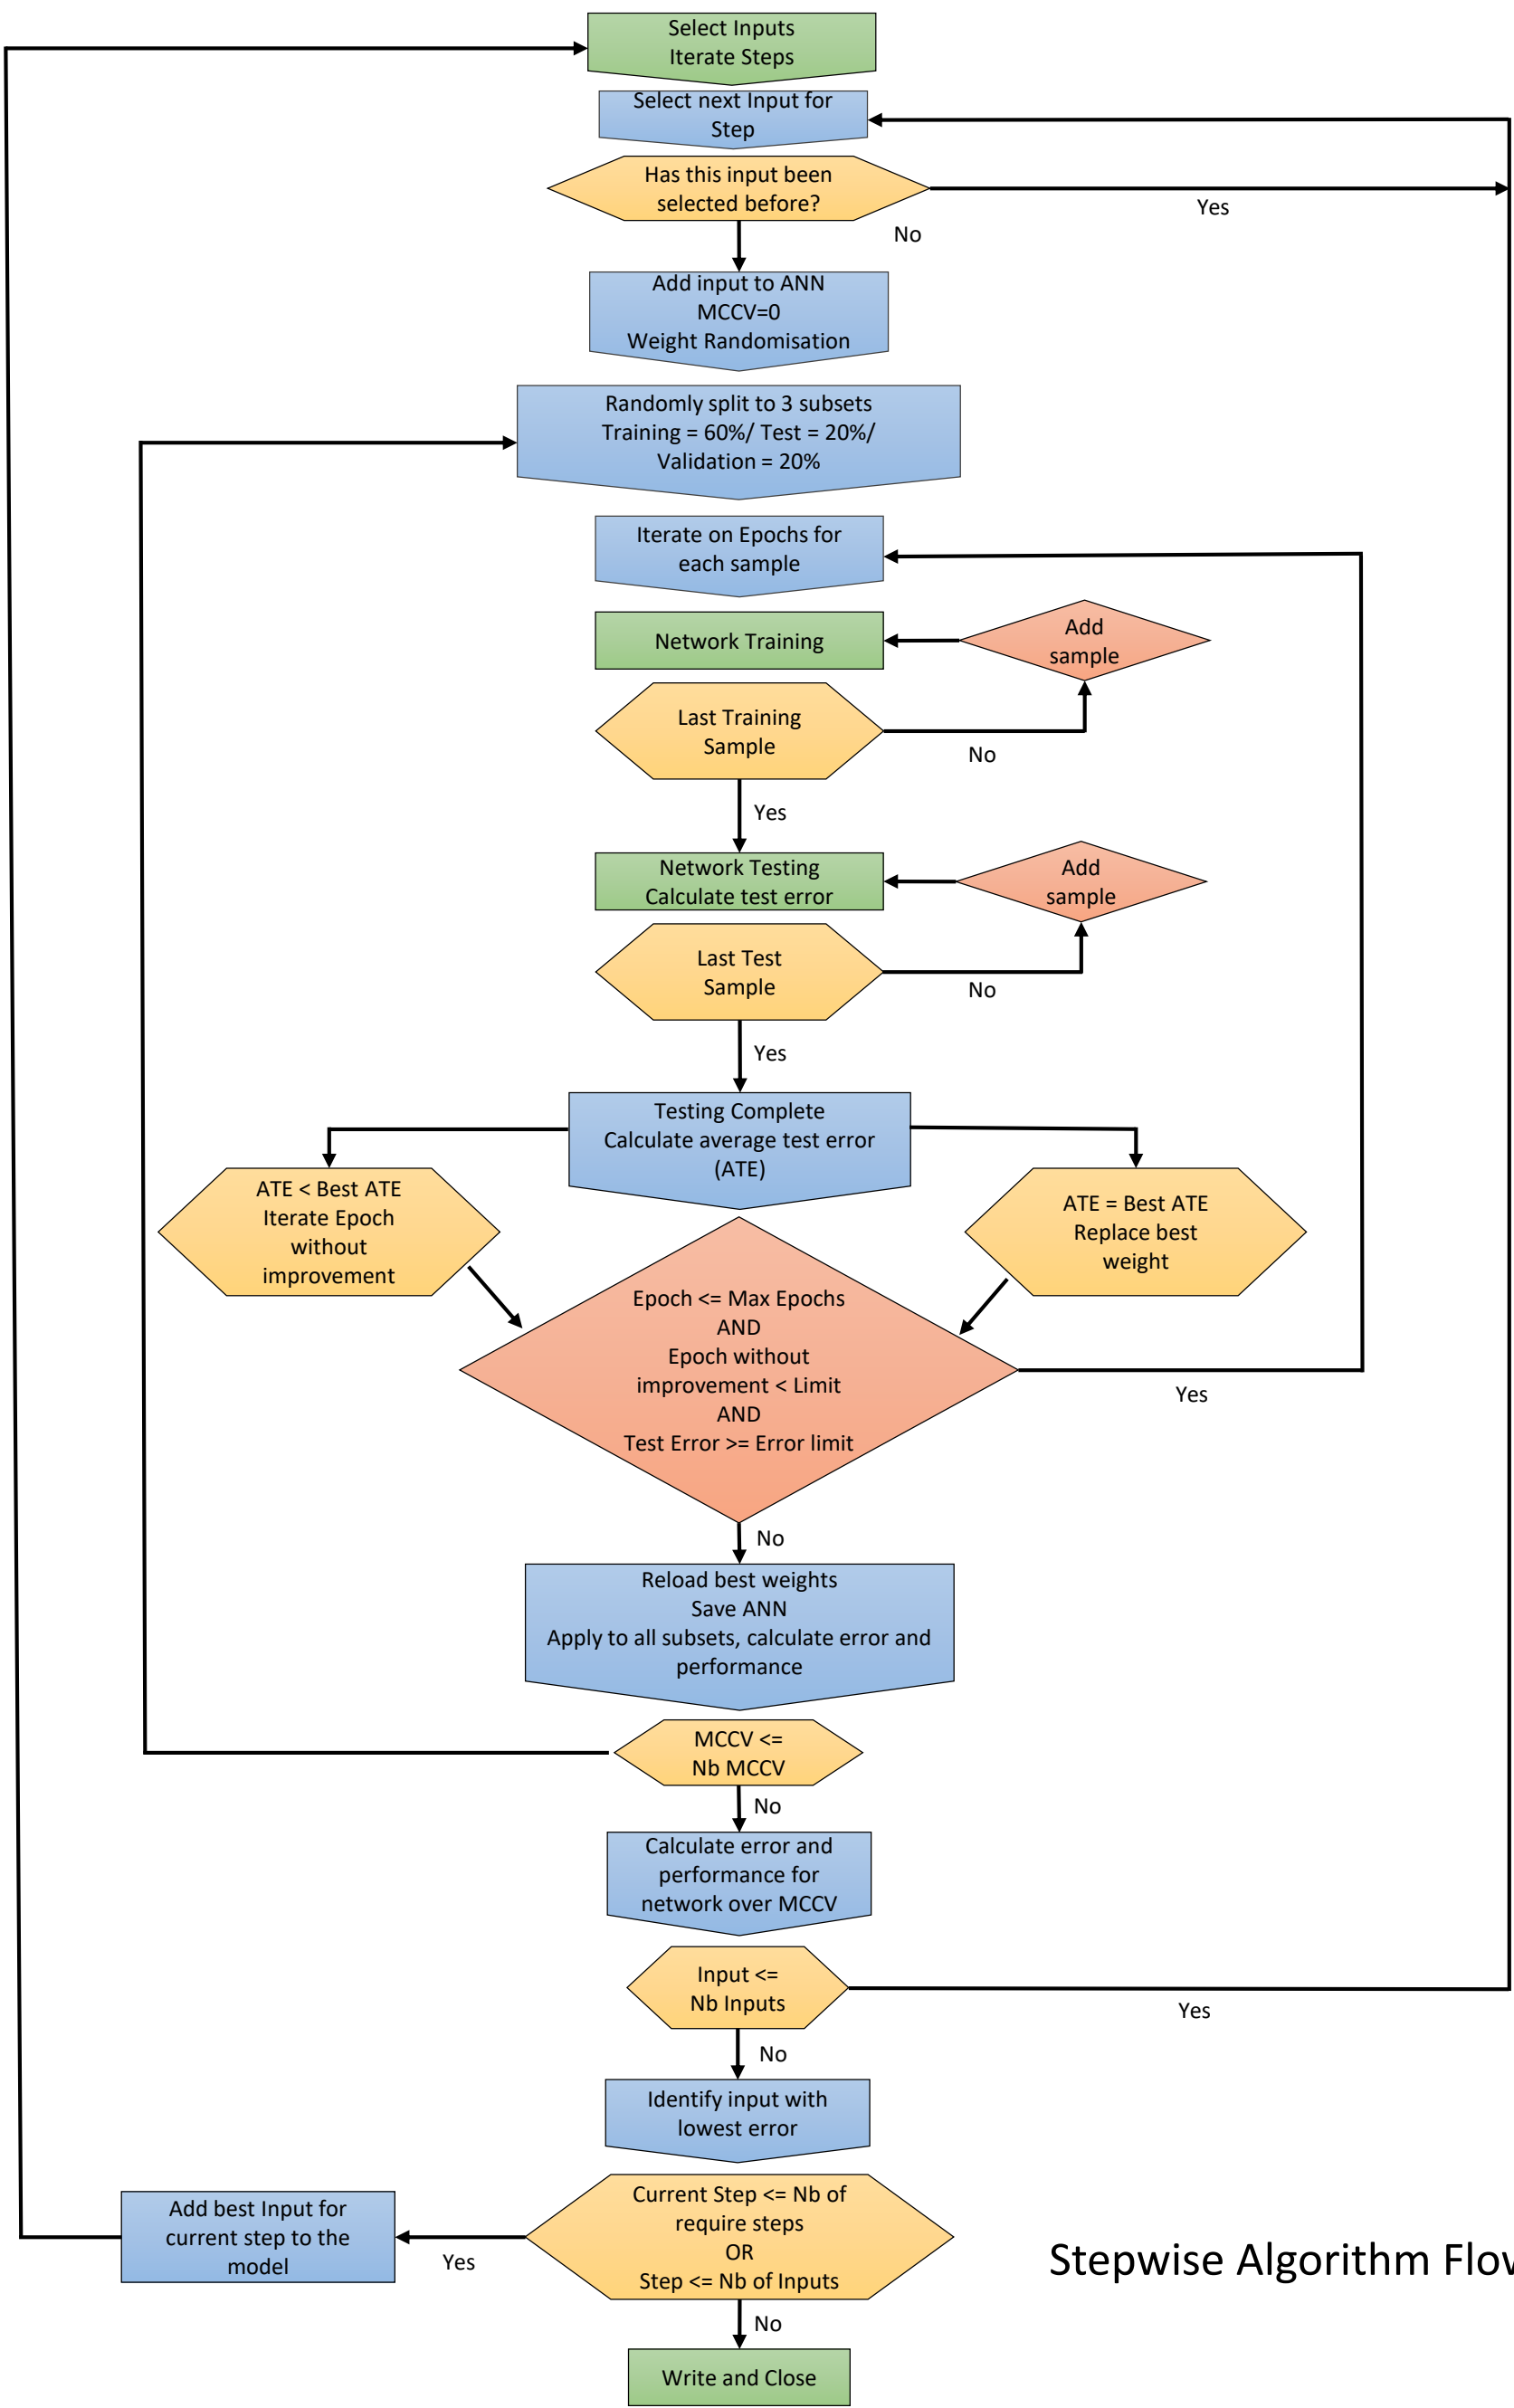

Stepwise Algorithm Flowchart

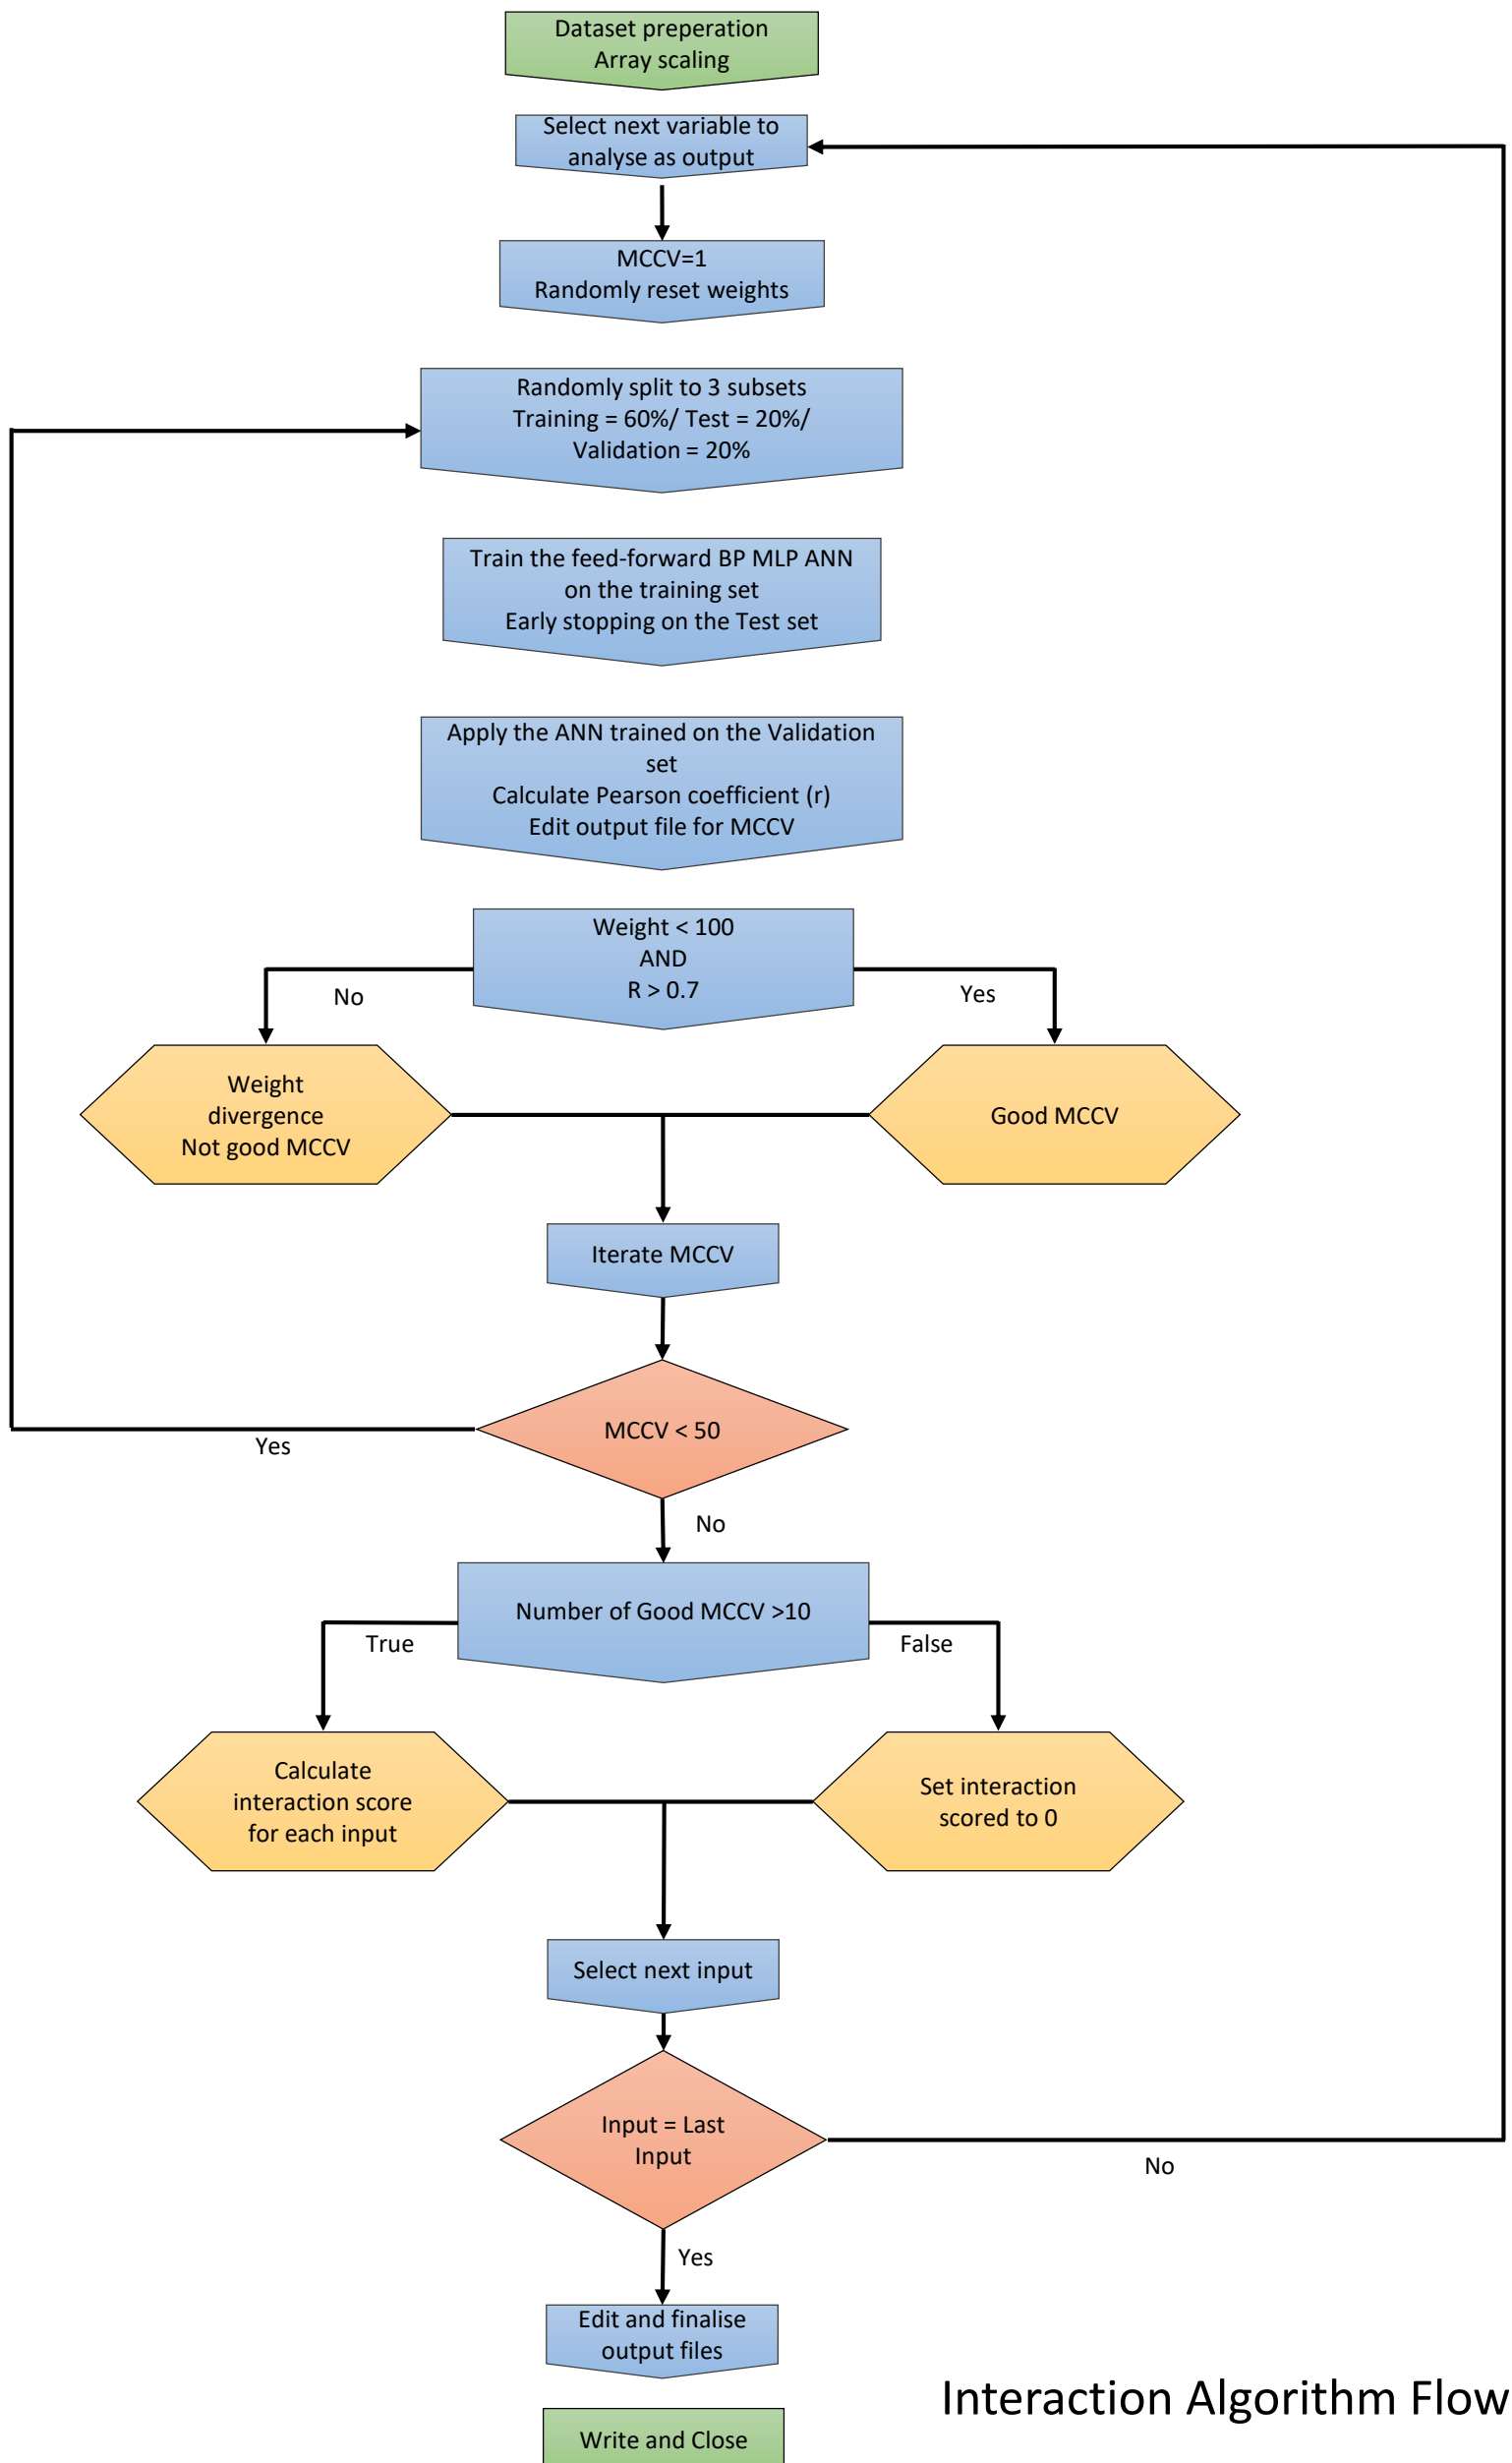

Interaction Algorithm Flowchart
